# Supplementary material for: Decreased brain and muscle ARNT-like protein 1 expression mediated the contribution of hyperandrogenism to insulin resistance in polycystic ovary syndrome
Source: Springer Nature journal article supplement (doi:10.1186/s12958-020-00592-1), 2020-04-25
Supplement: MOESM1 [file 17928648]

**Supplementary Figure 1**

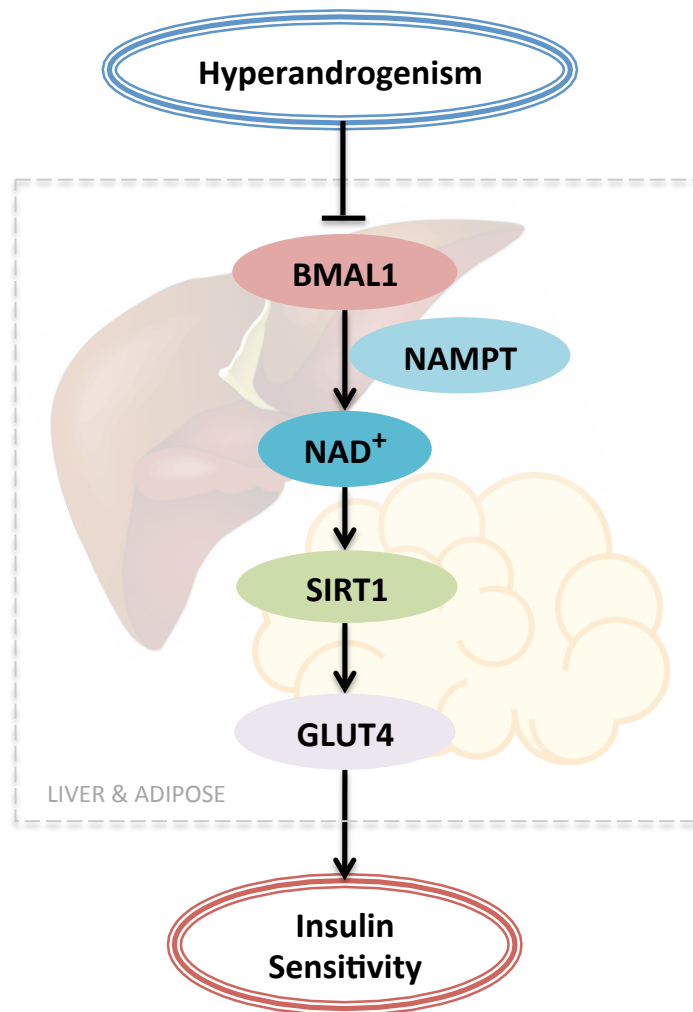

**Figure S1. Proposed signaling pathways underpinning the essential role of BMAL1 in the contribution of hyperandrogenism to insulin resistance in PCOS.**

Hyperandrogenism led to the negative regulation of BMAL1-induced expression of the NAMPT/NAD<sup>+</sup>/SIRT1 pathway, which further inhibited downstream GLUT4, contributing to insulin resistance both in the liver and adipose tissue of PCOS.
